# Supplementary material
Source: PubMed Central journal article supplement (PMC7704606)
Supplement: NIHMS1613231-supplement-1.pdf [file NIHMS1613231-supplement-1.pdf]

|                                           |                 |                                    |                               |                                                      |                                                              |
|-------------------------------------------|-----------------|------------------------------------|-------------------------------|------------------------------------------------------|--------------------------------------------------------------|
|                                           |                 |                                    |                               | 39%                                                  |                                                              |
| IFN $\beta$ -1b (Betaseron) <sup>50</sup> | Not fully known | CIS and RMS (1 <sup>st</sup> line) | SC injection, every other day | Relative reduction in ARR compared with placebo: 31% | Lymphopenia, flu-like symptoms, and injection-site reactions |

*ARR, annualized relapse rate; CDP, confirmed disability progression; CIS, clinically isolated syndrome; IFN  $\beta$ -1a, interferon beta 1a; IM, intramuscular; IV, intravenous; mAb, monoclonal antibody; PPMS, primary progressive multiple sclerosis; RMS, relapsing forms of multiple sclerosis; SC, subcutaneous; SPMS, secondary progressive multiple sclerosis.*

## Treatment of Multiple Sclerosis: A Review

### Supplementary Appendix

#### ADVANCES IN TREATMENT

##### Treating Acute Attacks

The terms 'acute attack', 'acute exacerbations' and 'relapses' are used interchangeably and refer to the onset or worsening of neurologic deficits lasting  $\geq 24$  hours in the absence of fever or infection.<sup>1</sup> When acute deterioration results from an increase in ambient temperature, fever or infection, this is considered a "pseudo exacerbation".<sup>1</sup> Glucocorticoids are used as first-line treatment for attacks as they provide short-term clinical benefit by reducing the severity and shortening the duration of attacks. Typically intravenous (IV) methylprednisolone 1 g/day for 3–5 days is given, often followed by an oral course of prednisone beginning at a dose of 60–80 mg/day and then tapered over 2 weeks.<sup>1</sup> Other glucocorticoid considerations are dexamethasone<sup>1</sup> and high-dose oral prednisone (in equivalent doses to high-dose IV methylprednisolone) that appears to be equally effective.<sup>2</sup>

Second-line treatment for patients resistant or refractory to glucocorticoid treatment includes plasmapheresis, IV immunoglobulin (IVIG), and adrenocorticotrophic hormone (ACTH). The use of plasmapheresis (plasma exchange) is reserved for cases of severe symptoms refractory to glucocorticoids and generally involves five to seven exchanges (40–60 mL/kg per exchange) every other day for 14 days.<sup>1</sup> IVIG is not approved in this indication but is sometimes used off-label in steroid-unresponsive patients as second- or third-line treatment; notably, this is the preferred treatment for postpartum patients. ACTH is another FDA-approved option but is rarely used because of high cost and uncertain advantages over glucocorticoids; in individuals

with poor intravenous access or who are unable to tolerate oral corticosteroids, ACTH is given intramuscularly at 80-120 units for two to three weeks and can be tapered.

### Symptomatic Therapies

For all patients, it is useful to encourage attention to a healthy lifestyle, including maintaining an optimistic outlook, a healthy diet, and regular exercise as tolerated (swimming is often well-tolerated because of the cooling effect of cold water in heat-sensitive individuals). Because vitamin D deficiency is considered a risk factor for MS and osteopenia, it is reasonable also to correct with oral vitamin D. Supplementary Table 1 summarizes treatment options for common symptoms in MS.

### REFERENCES

1. Berkovich RR. Acute Multiple Sclerosis Relapse. *Continuum (Minneapolis, Minn)*. 2016;22(3):799-814.
2. Le Page E, Veillard D, Laplaud DA, et al. Oral versus intravenous high-dose methylprednisolone for treatment of relapses in patients with multiple sclerosis (COPOUSEP): a randomised, controlled, double-blind, non-inferiority trial. *Lancet*. 2015;386(9997):974-981.
3. Chang E, Ghosh N, Yanni D, Lee S, Alexandru D, Mozaffar T. A Review of Spasticity Treatments: Pharmacological and Interventional Approaches. *Crit Rev Phys Rehabil Med*. 2013;25(1-2):11-22.
4. Henze T, Rieckmann P, Toyka KV. Symptomatic treatment of multiple sclerosis. Multiple Sclerosis Therapy Consensus Group (MSTCG) of the German Multiple Sclerosis Society. *European neurology*. 2006;56(2):78-105.
5. Toosy A, Ciccarelli O, Thompson A. Symptomatic treatment and management of multiple sclerosis. *Handb Clin Neurol*. 2014;122:513-562.
6. Institute of Medicine Committee on Multiple Sclerosis: Current S, Strategies for the F. In: Joy JE, Johnston RB, Jr., eds. *Multiple Sclerosis: Current Status and Strategies for the Future*. Washington (DC): National Academies Press (US); 2001.
7. Jensen HB, Ravnborg M, Dalgas U, Stenager E. 4-Aminopyridine for symptomatic treatment of multiple sclerosis: a systematic review. *Therapeutic advances in neurological disorders*. 2014;7(2):97-113.
8. Turner-Stokes L, Ashford S, Esquenazi A, et al. A comprehensive person-centered approach to adult spastic paresis: a consensus-based framework. *Eur J Phys Rehabil Med*. 2018;54(4):605-617.

9. Schneider SA, Deuschl G. The treatment of tremor. *Neurotherapeutics : the journal of the American Society for Experimental NeuroTherapeutics*. 2014;11(1):128-138.

Journal Pre-proof

## SUPPLEMENTARY TABLES

Supplementary Table 1. Symptomatic Treatment Approaches in Multiple Sclerosis (MS)

| MS Symptom                                  | Approximate Frequency in MS | Non-Pharmacological Treatments:<br>Key Recommendations                                                                                                                              | Pharmacological Treatments:<br>Key Recommendations                                                                                                                                                                                                                                                                               |
|---------------------------------------------|-----------------------------|-------------------------------------------------------------------------------------------------------------------------------------------------------------------------------------|----------------------------------------------------------------------------------------------------------------------------------------------------------------------------------------------------------------------------------------------------------------------------------------------------------------------------------|
| <b>Spasticity and spasms</b> <sup>3-5</sup> | 90%                         | <ul style="list-style-type: none"> <li>• Physiotherapy (including stretching)</li> <li>• Occupational therapy</li> </ul>                                                            | <ul style="list-style-type: none"> <li>• Baclofen (oral [10–120 mg/day] and intrathecal)</li> <li>• Tizanidine (2–36 mg/day)</li> <li>• Gabapentin (300–3600 mg/day)</li> <li>• Clonazepam (0.25–2 mg/day)</li> <li>• Diazepam (6-15 mg/day)</li> <li>• Cannabinoids</li> <li>• Botulinum toxin injection</li> </ul>             |
| <b>Impaired gait</b> <sup>6-8</sup>         | 80%                         | <ul style="list-style-type: none"> <li>• Adaptive devices</li> <li>• Physiotherapy</li> <li>• Functional electrical stimulation</li> </ul>                                          | <ul style="list-style-type: none"> <li>• 4-Aminopyridine (Dalfampridine) (20mg/day)</li> </ul>                                                                                                                                                                                                                                   |
| <b>Pain</b> <sup>4,5</sup>                  | Up to 86%                   | <ul style="list-style-type: none"> <li>• Pain Management</li> </ul>                                                                                                                 | <ul style="list-style-type: none"> <li>• Gabapentin (300–2400 mg/day)</li> <li>• Pregabalin (150–600 mg/day)</li> <li>• Duloxetine (20-120 mg/day)</li> <li>• Amitriptyline (25–150 mg/day)</li> <li>• Carbamazepine (100–1600 mg/day)</li> <li>• Lamotrigine (200–400 mg/day)</li> <li>• Topiramate (200–300 mg/day)</li> </ul> |
| <b>Ataxia/tremor</b> <sup>4,5,9</sup>       | 80%                         | <ul style="list-style-type: none"> <li>• Physiotherapy</li> <li>• Occupational therapy</li> <li>• Wrist weights</li> <li>• Thalamotomy</li> <li>• Deep-brain stimulation</li> </ul> | <ul style="list-style-type: none"> <li>• Carbamazepine (400–600 mg/day)</li> <li>• Propranolol (40–240 mg/day)</li> <li>• Topiramate (100–333 mg/day)</li> </ul>                                                                                                                                                                 |

|                                             |        |                                                                                                                                                                                                                                                                                       |                                                                                                                                                                                                                                                                                             |
|---------------------------------------------|--------|---------------------------------------------------------------------------------------------------------------------------------------------------------------------------------------------------------------------------------------------------------------------------------------|---------------------------------------------------------------------------------------------------------------------------------------------------------------------------------------------------------------------------------------------------------------------------------------------|
|                                             |        |                                                                                                                                                                                                                                                                                       | <ul style="list-style-type: none"> <li>• Cannabinoids</li> <li>• Primidone (<i>up to 750 mg/day</i>)</li> <li>• Ondansetron (<i>8 mg/day</i>)</li> <li>• Clonazepam (<i>3–6 mg/day</i>)</li> <li>• (These agents have been tried with mixed success; response is generally poor)</li> </ul> |
| <b>Bladder dysfunction</b> <sup>4,5</sup>   | 70–80% | <u>Assessments:</u> <ul style="list-style-type: none"> <li>• Urodynamic testing</li> </ul> <u>Treatments:</u> <ul style="list-style-type: none"> <li>• Pelvic floor exercises</li> <li>• Electrical stimulation</li> <li>• Fluid intake management</li> <li>• Urinary aids</li> </ul> | <ul style="list-style-type: none"> <li>• Mirabegron</li> <li>• Oxybutynin</li> <li>• Tolterodine</li> <li>• Solifenacin</li> <li>• Trosipium chloride (<i>40–60 mg/day</i>)</li> <li>• Desmopressin (<i>up to 20 µg</i>)</li> </ul>                                                         |
| <b>Depression</b> <sup>4,5</sup>            | 50%    | <ul style="list-style-type: none"> <li>• Psychotherapy</li> <li>• Counselling</li> </ul>                                                                                                                                                                                              | <ul style="list-style-type: none"> <li>• Fluoxetine</li> <li>• Sertraline</li> <li>• Escitalopram</li> <li>• Bupropion</li> <li>• Venlafaxine</li> </ul>                                                                                                                                    |
| <b>Fatigue</b> <sup>4,5</sup>               | 75%    | <ul style="list-style-type: none"> <li>• Cooling</li> <li>• Regular exercise</li> <li>• Physiotherapy</li> <li>• Sleep hygiene</li> </ul>                                                                                                                                             | <ul style="list-style-type: none"> <li>• Modafinil (<i>200–400 mg/day</i>)</li> <li>• Armodafinil</li> <li>• Methylphenidate</li> </ul>                                                                                                                                                     |
| <b>Cognitive dysfunction</b> <sup>4,5</sup> | 40–70% | <ul style="list-style-type: none"> <li>• Attention training</li> <li>• Memory training</li> <li>• Cognitive rehabilitation</li> </ul>                                                                                                                                                 | <ul style="list-style-type: none"> <li>• Lisdexamfetamine</li> </ul>                                                                                                                                                                                                                        |
| <b>Paroxysmal symptoms</b> <sup>4,5</sup>   | 10–20% | <ul style="list-style-type: none"> <li>• Thermocoagulation</li> <li>• Radiotherapy</li> </ul>                                                                                                                                                                                         | <ul style="list-style-type: none"> <li>• Carbamazepine (<i>100–300 mg/day</i>)</li> <li>• Oxcarbazepine</li> <li>• Lamotrigine (<i>up to 400 mg/day</i>)</li> <li>• Gabapentin (<i>up to 1600 mg/day</i>)</li> <li>• Topiramate (<i>up to 300 mg/day</i>)</li> </ul>                        |
